# Supplementary material for: Environmental and Physiological Factors Affecting High-Throughput Measurements of Bacterial Growth
Source: PubMed Central journal article supplement (PMC7587430; doi:10.1128/mbio.01378-20), 2020-10-20

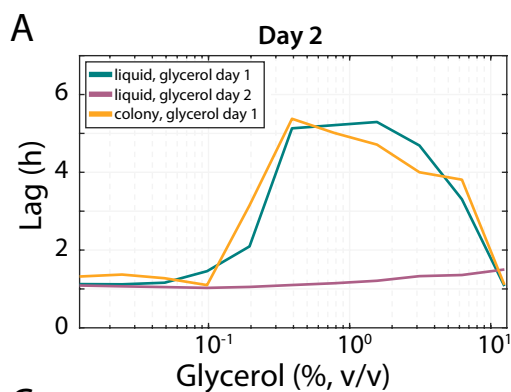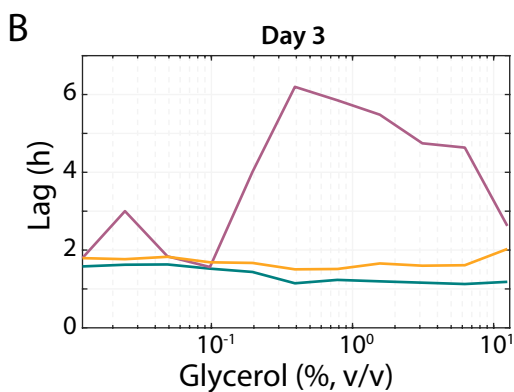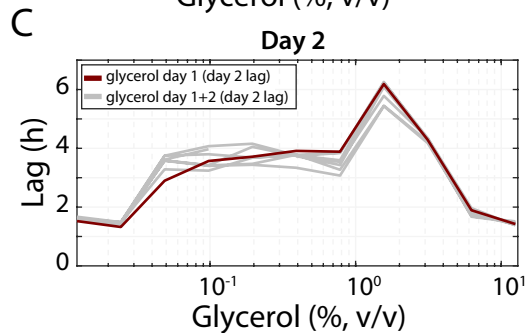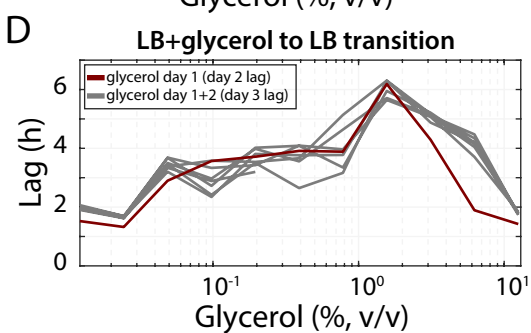

Supplement: mBio.01378-20-sf004.pdf [file mBio.01378-20-sf004.pdf]
